# Supplementary material for: The SH3PXD2A-HTRA1 fusion transcript is extremely rare in Norwegian sporadic vestibular schwannoma patients
Source: PubMed Central journal article supplement (PMC8367919; doi:10.1007/s11060-021-03796-6), 2021-07-02
Supplement: 11060_2021_3796_MOESM1_ESM.pdf [file 11060_2021_3796_MOESM1_ESM.pdf]

**Supplementary material:**

*Supplementary table 1. Primer information*

| Oligo name          | Sequence                            |
|---------------------|-------------------------------------|
| <i>SH3XPD2Aex4F</i> | TGAAGAGACTGAAGCCCATC                |
| <i>Fusion_R</i>     | GTTGGGATCTTCCTGCCCTGATTCCTCTTGGAAC  |
| <i>Fusion_F</i>     | GTTCCAAGAGGAAATCAGGGCAGGAAGATCCCAAC |
| <i>HTRA1R_HUS</i>   | CGACACAATAAACCCAGACC                |

*Supplementary table 2. PCR setup, amplifying the HTRA1 and SH3PXD2A genes*

| Reactions                     | Primers             | PCR product (bp) |
|-------------------------------|---------------------|------------------|
| <i>SH3PXD2A amplification</i> | <i>SH3XPD2Aex4F</i> | 173              |
|                               | <i>Fusion_R</i>     |                  |
| <i>HTRA1 amplification</i>    | <i>Fusion_F</i>     | 176              |
|                               | <i>HTRA1R_HUS</i>   |                  |

|      |     |        |
|------|-----|--------|
| 94°C | 10m | } x 35 |
| 94°C | 30s |        |
| 58°C | 30s |        |
| 72°C | 30s |        |
| 72°C | 7m  |        |
| 4°C  | ∞   |        |

*Supplementary table 3. PCR setup for amplification of the HTRA1-SH3PXD2A fusion transcript*

|                                            |                  |                                  |                                |
|--------------------------------------------|------------------|----------------------------------|--------------------------------|
| <i>SH3PXD2A-HTRA1 fusion amplification</i> | <i>Template:</i> | <i>SH3PXD2A + HTRA1</i>          |                                |
|                                            | <i>Primers:</i>  | <i>SH3PXD2Aex4F</i><br>(forward) | <i>HTRA1R_HUS</i><br>(reverse) |

2  $\mu$ l of the product from each of the previous reactions (for HTRA1 and SH3PXD2A, respectively) were mixed and used as DNA template in a new PCR reaction, yielding the fusion transcript. This reaction first ran 15 cycles without primers, which allowed annealing of the extension overlaps. The annealing temperature was 65° C, but the other parameters

were the same as before. After addition of 2  $\mu$ l of each of the primers, the reaction ran an additional 30 cycles with an annealing temperature of 58° C. See supplementary figure for a schematic overview of the process.

a) *The reaction first ran 15 cycles without primers, enabling annealing of the extension overlaps.*

|      |          |        |
|------|----------|--------|
| 94°C | 10m      | } x 15 |
| 94°C | 30s      |        |
| 65°C | 30s      |        |
| 72°C | 30s      |        |
| 72°C | 7m       |        |
| 4°C  | $\infty$ |        |

b) *After addition of 2  $\mu$ l of the PCR primers, the setup ran an additional 30 cycles.*

|      |          |        |
|------|----------|--------|
| 94°C | 10m      | } x 30 |
| 94°C | 30s      |        |
| 58°C | 30s      |        |
| 72°C | 30s      |        |
| 72°C | 7m       |        |
| 4°C  | $\infty$ |        |

*Supplementary table 4. Primers and probe, real-time PCR*

|                |                                  |
|----------------|----------------------------------|
| <i>Forward</i> | <i>GGCAGTTCCAAGAGGAAATCAG</i>    |
| <i>Reverse</i> | <i>CCACGTCCGCGATAAAGTTATATT</i>  |
| <i>Probe</i>   | <i>ATGGCGCAAACCTGTTGGGATCTTC</i> |
